# Supplementary material
Source: publisher site journal article supplement (https://www.dovepress.com/article/361609)
Supplement: Supplementary file 1 [file get_supplementary_file.php]

## Supplementary material 1: Sequences for RT-qPCR primers.

| Primer                                   | Sequences                             |
|------------------------------------------|---------------------------------------|
| <i>Hprt</i> - Forward                    | 5'-GCTTGCTGGTGAAAAGGACCTCTCGAAG-3'    |
| <i>Hprt</i> - Reverse                    | 5'-CCCTGAAGTACTCATTATAGTCAAGGGGCAT-3' |
| <i>Irg1</i> - Forward                    | 5'-GCAACATGATGCTCAAGTCTG-3'           |
| <i>Irg1</i> - Reverse                    | 5'-TGCTCCTCCGAATGATACCA-3'            |
| <i>Nrf2</i> - Forward                    | 5'-CAGCATAGAGCAGGACATGGAG-3'          |
| <i>Nrf2</i> - Reverse                    | 5'-GAACAGCGGTAGTATCAGCCAG-3'          |
| <i>Il-1<math>\beta</math></i> - Forward  | 5'-GCCTTGGGCCTCAAAGGAAAGAA-3'         |
| <i>Il-1<math>\beta</math></i> - Reverse  | 5'-ATTGCTTGGGATCCCACTCTCC-3'          |
| <i>Il-6</i> - Forward                    | 5'-ACAAAGCCAGAGTCCTTCAGAGAG-3'        |
| <i>Il-6</i> - Reverse                    | 5'-TTGGATGGTCTTGGTCCTTAGCCA-3'        |
| <i>Tnf-<math>\alpha</math></i> - Forward | 5'-CCTATGTCTCAGCCTCTTCT-3'            |
| <i>Tnf-<math>\alpha</math></i> - Reverse | 5'-GGGAACTTCTCATCCCTTTG-3'            |

Supplementary material 2: Results of power analysis.

| Variable                                       | Test                     | Effect size* | Power |
|------------------------------------------------|--------------------------|--------------|-------|
| <i>Irg1</i> mRNA expression                    | Student's <i>t</i> -test | 8.97         | 1.0   |
| Itaconate abundance                            | Student's <i>t</i> -test | 11.56        | 1.0   |
| <i>Nrf2</i> mRNA expression                    | Student's <i>t</i> -test | 8.01         | 1.0   |
| <i>Il-1<math>\beta</math></i> mRNA expression  | ANOVA                    | 4.64         | 1.0   |
| <i>Il-6</i> mRNA expression                    | ANOVA                    | 7.50         | 1.0   |
| <i>Tnf-<math>\alpha</math></i> mRNA expression | ANOVA                    | 16.88        | 1.0   |

\*Effect sizes are Cohen's *d* for *t*-tests and *f* for ANOVAs.
